# Supplementary material
Source: publisher site journal article supplement (https://www.dovepress.com/article/144002)
Supplement: Supplementary file 1 [file get_supplementary_file.php]

**Supplementary information**

ORIGINAL RESEARCH

Short running header: Differential radiation response between normal and glioma cell

Liang Gong et al

**Differential radiation response between normal and glioma cell  
revealed by comparative transcriptome analysis**

Liang Gong<sup>2</sup>

Jiacheng Gu<sup>1</sup>

Jianwei Ge<sup>1</sup>

Weiji Weng<sup>1</sup>

Guoyi Gao<sup>1</sup>

Junfeng Feng<sup>1</sup>

Qing Mao<sup>1</sup>

<sup>1</sup> Department of Neurosurgery, Renji Hospital, School of Medicine, Shanghai Jiao Tong University, Shanghai 200127, P.R. China; <sup>2</sup> Department of Neurosurgery, Punan Hospital of Shanghai, Shanghai 200125, P.R. China

Correspondence: Qing Mao

Department of Neurosurgery, Ren Ji Hospital, School of Medicine, Shanghai Jiao Tong University, No. 160, Pujian road, Pudong new zone, Shanghai 200127, P.R. China.

Tel: +86 2168383740

Fax: +86 2168383739

Email : jackmaoneuro@163.com

## Supplementary Figures

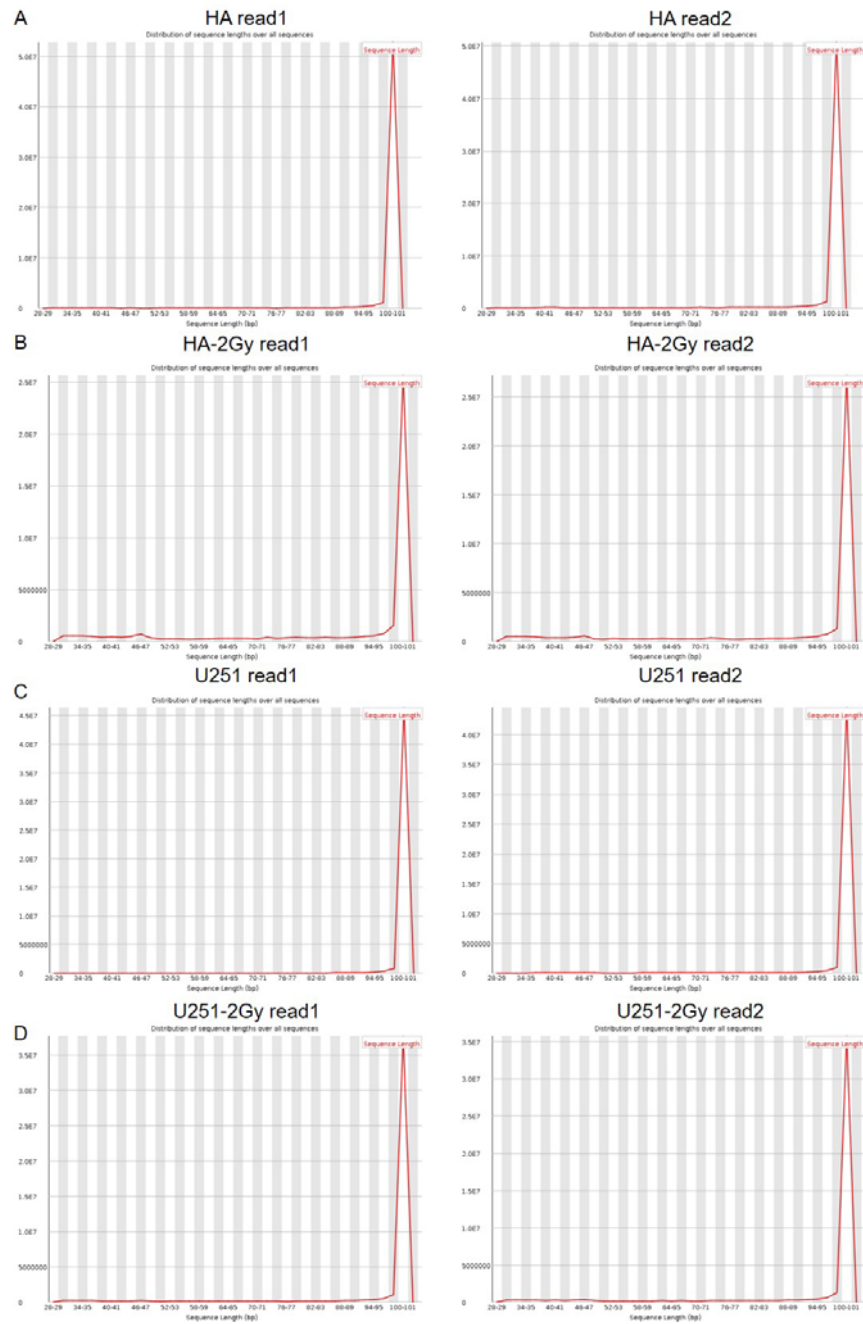

**Figure S1** Distribution of read length.

**Notes:** Read length distribution of the RNA sequencing data from normal HA cell (**A**), radiation-treated HA cell (**B**), normal U251 cell (**C**), radiation-treated U251 cell (**D**). (**Left:** read 1, **Right:** read 2).

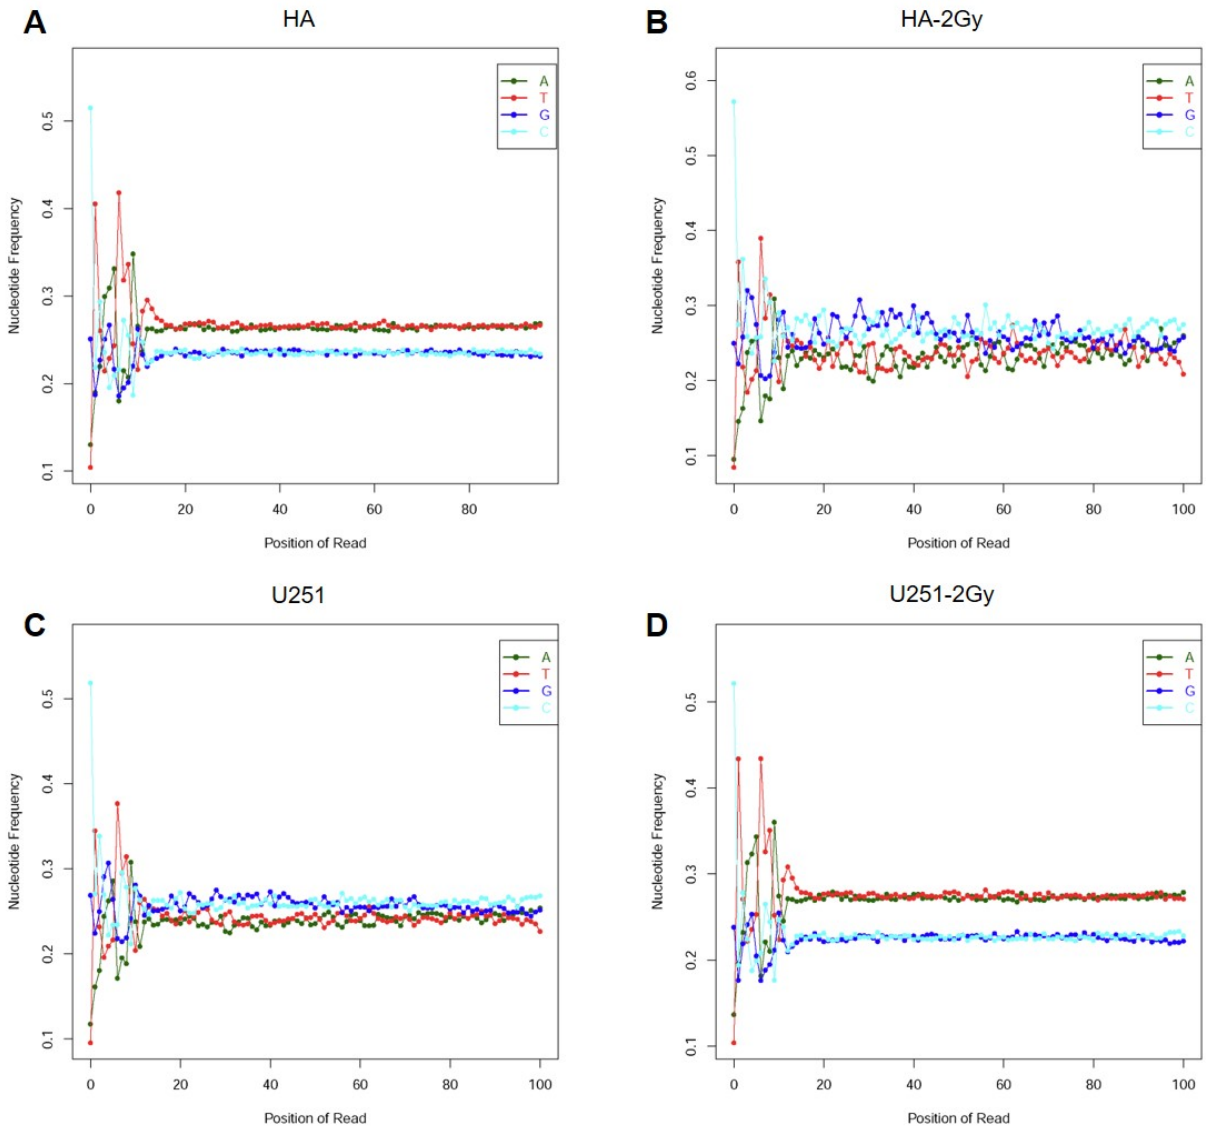

**Figure S2** Nucleotide distribution across all reads.

**Notes:** Nucleotide distribution of the RNA sequencing data from normal HA cell (**A**), radiation-treated HA cell (**B**), normal U251 cell (**C**), radiation-treated U251 cell (**D**). (**Left:** read 1, **Right:** read 2).

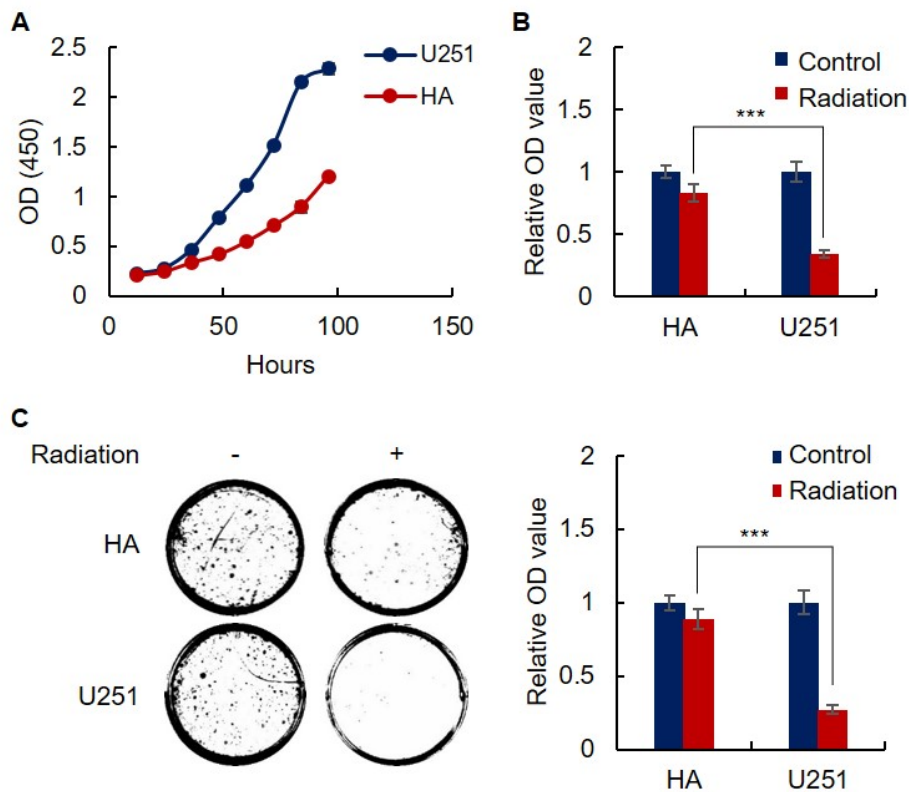

**Figure S3** HA cells are more resistant to radiation than U251 cells.

**Notes:** **(A)** Growth curves of HA and U251 cells. The cells were plated in the well of 96 well plate at a density of 3,000 cells / well. Every 12 h, the cells in the wells of three parallel plates were subjected to CCK-8 analysis. **(B)** CCK-8 assay showed the cell viability of HA and U251 cells after radiation treatment. HA and U251 cells were treated with (radiation group) or without (control group) 10 Gy of radiation. The cells were then cultured in complete culture media for 48 h. The cell number was measured by CCK-8 kits. Data were normalized to control group. \*\*\* P < 0.001. **(C)** Colony formation assay showed the radiation-induced cytotoxicity on HA and U251. The cells were pretreated with or without 30Gy of radiation followed by 15 days culture. The colonies were visualized by crystal violet and the colonies with > 50 cells were counted under a dissecting scope. The statistics was shown on the right (The number of colonies were normalized to control group). \*\*\* P < 0.001.

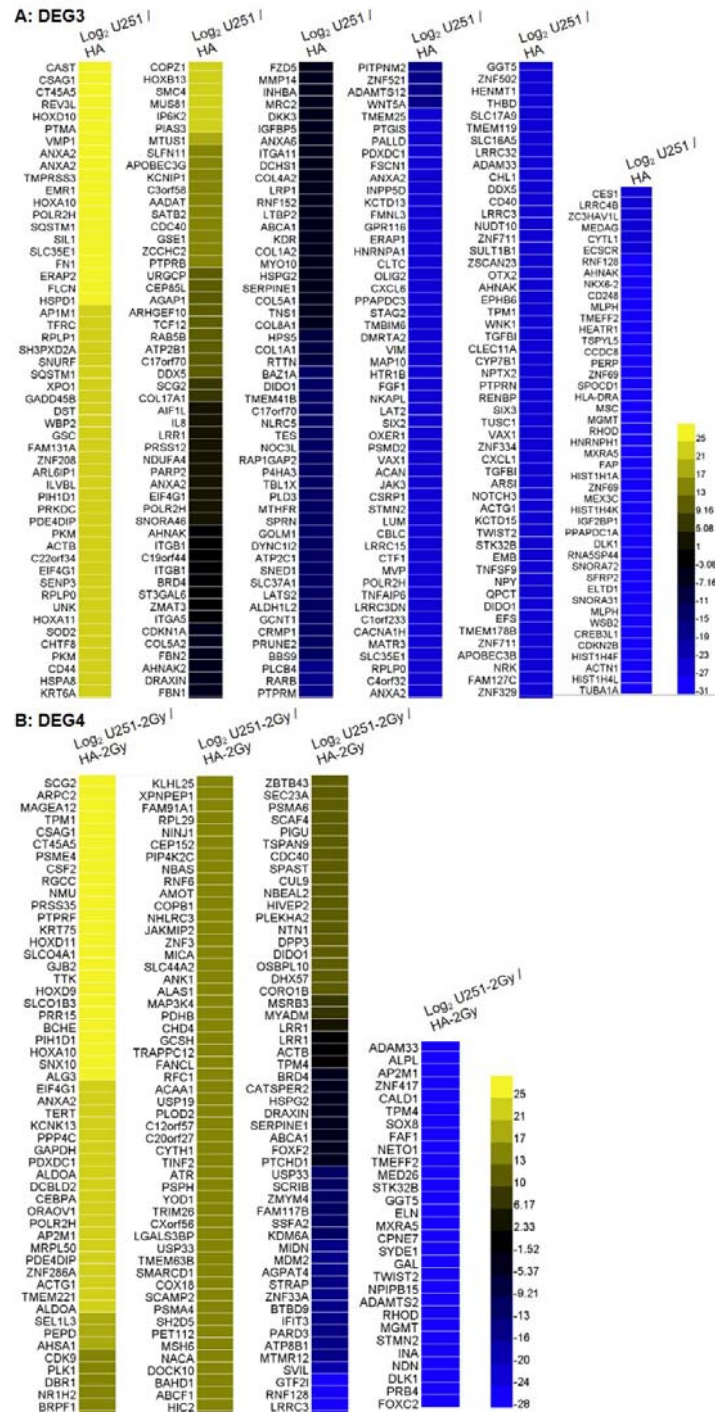

**Figure S4** Differentially expressed genes between untreated HA and U251 cells and between radiation-treated HA and U251.

**Notes: (A)** Total RNAs were extracted from HA and U251 cells under normal culture condition. The mRNA expression profile was generated by next-generation sequencing. The differentially expressed genes

between untreated HA and U251 cells were listed. **(B)** HA and U251 cells were treated with 2Gy of radiation. One hour after treatment, the total mRNA of the cells were then extracted to produce mRNA expression profile. The differentially expressed genes between between these two radiation-treated cells were presented.

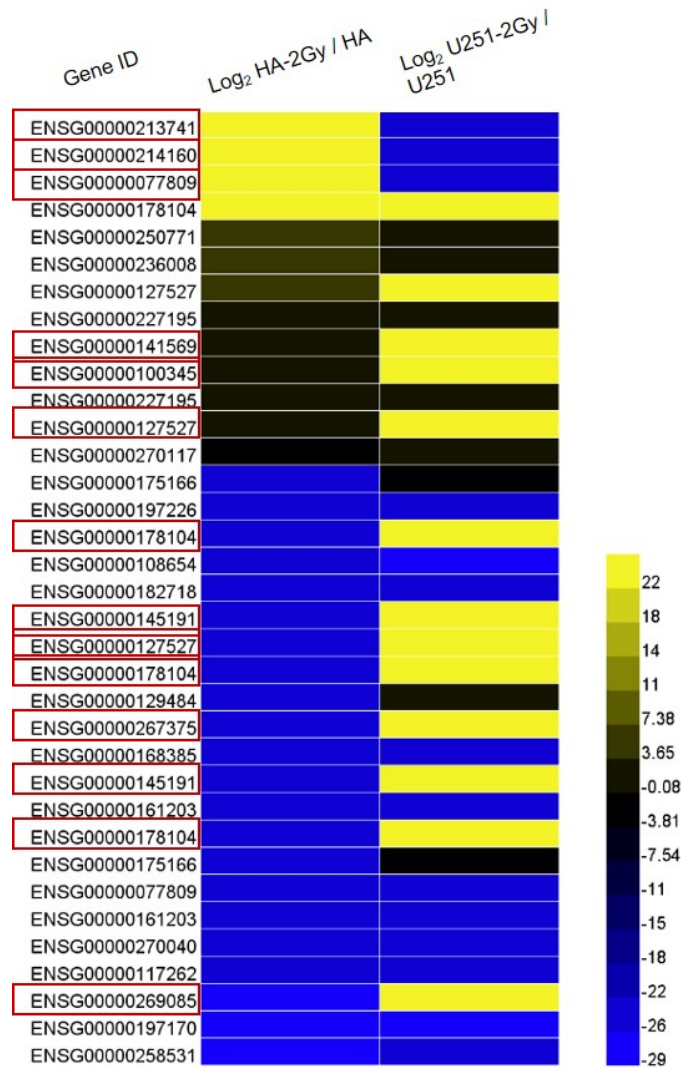

**Figure S5** LncRNAs regulated by radiation in both HA and U251 cells.

**Notes:** LncRNAs oppositely regulated by radiation were highlighted.

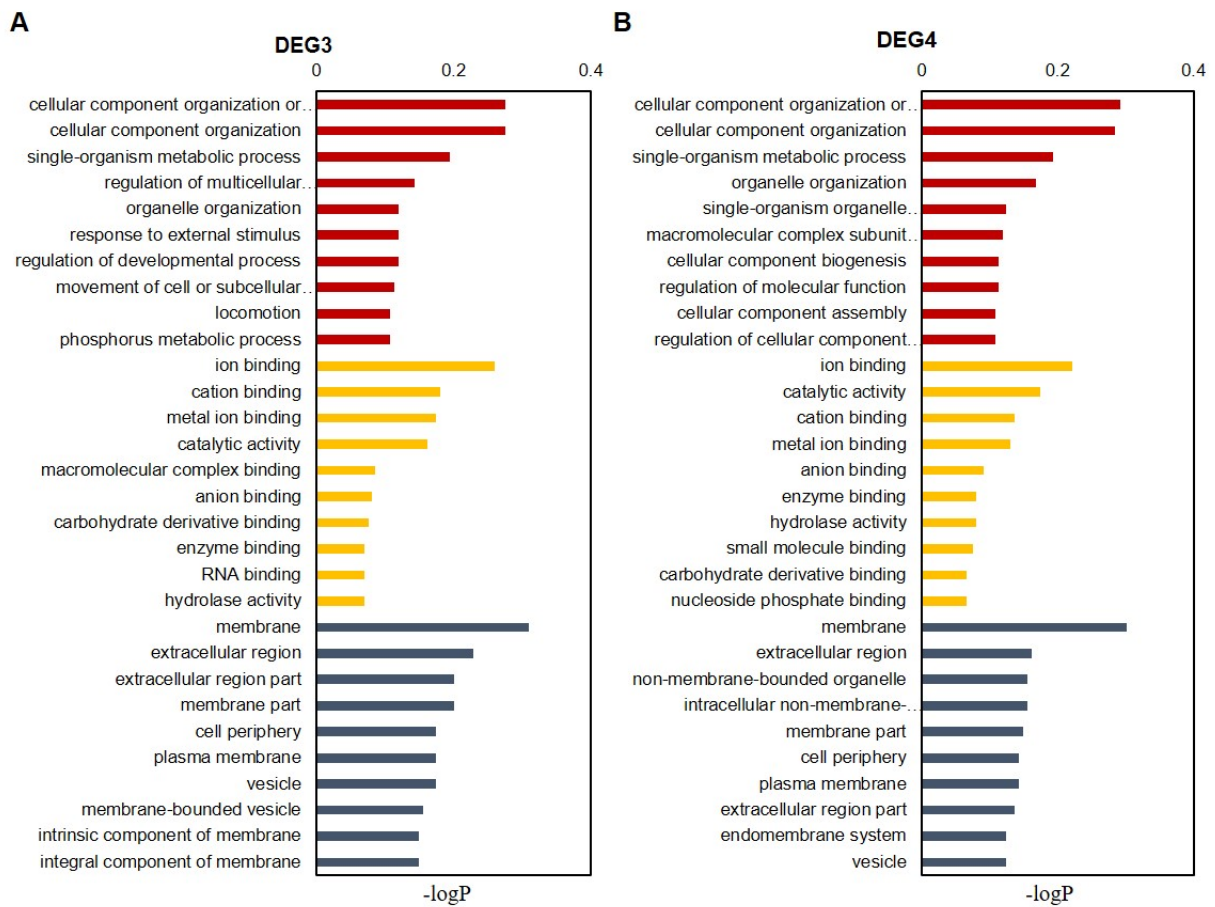

**Figure S6** Gene ontology analysis of genes differentially expressed between HA and U251 cells.

**Notes:** Genes differentially expressed between nontreated HA and U251 cells **(A)** and radiation-treated HA and U251 cells **(B)** were subjected to ipathwayGuide online software for gene ontology analysis. Top ten gene ontology terms in cellular components (Red), molecular function (Yellow) and biological process (blue) category were listed.

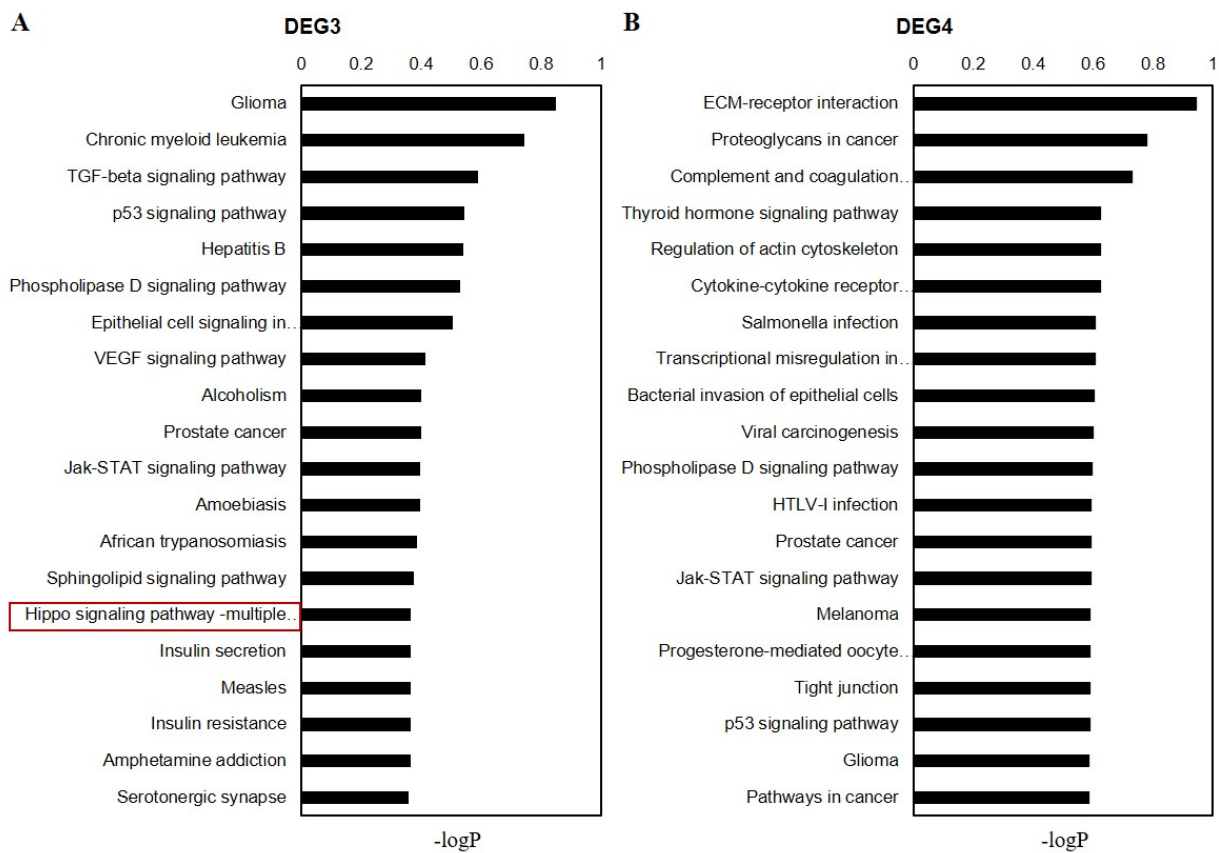

**Figure S7** Pathway analysis of genes differentially expressed between HA and U251 cells.

**Notes:** Genes differentially expressed between nontreated HA and U251 cells (**A**) and radiation-treated HA and U251 cells (**B**) were subjected to ipathwayGuide online software for pathway analysis. Top twenty impact signaling pathway were listed.



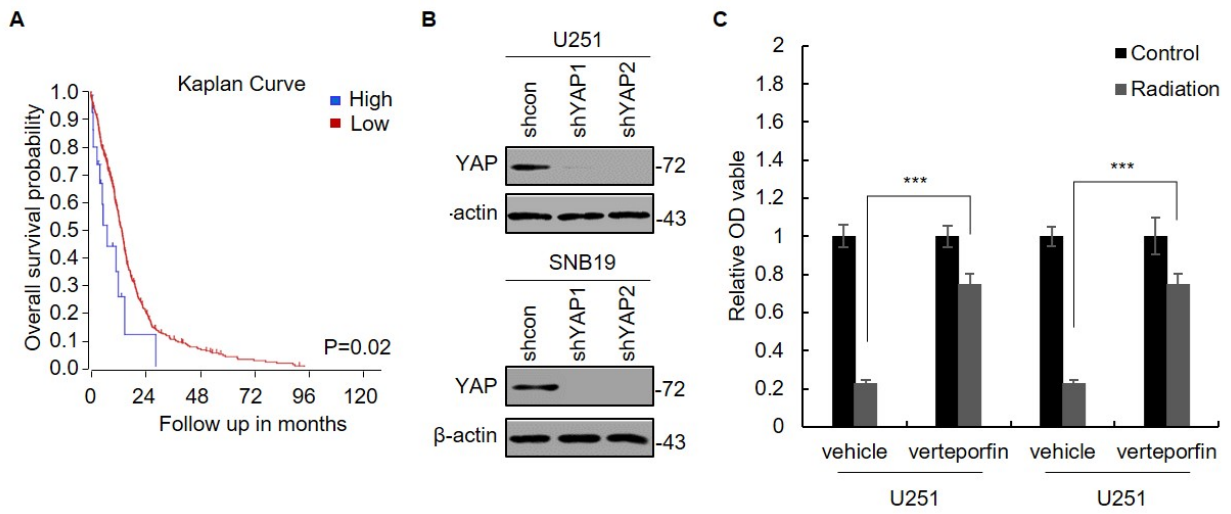

**Figure S8** Suppression of YAP induces radiation-resistance of glioma cells.

**Notes:** (A) High expression of YAP predicts poor prognosis of patients with glioma. (B) Characterization of YAP-knockdown U251 and SNB19 cells. (C) Verteporfin reduced cytotoxic effect of radiation on U251 and SNB19 cells.

**Supplemental table:**

**Table S1.** The number of reads and high quality reads ratio.

| Sample   | Raw reads   | Raw bases      | Raw read pairs | Trim reads  | Trim read pairs | Trim bases     | Average length | Trim reads % | Trim bases % |
|----------|-------------|----------------|----------------|-------------|-----------------|----------------|----------------|--------------|--------------|
| HA       | 124,202,714 | 12,544,474,114 | 62,101,357     | 118,116,766 | 5,905,8383      | 11,536,800,280 | 97.7           | 95.1%        | 92.0%        |
| HA-2Gy   | 102,304,860 | 10,332,790,860 | 51,152,430     | 82,337,002  | 41,168,501      | 7,285,391,087  | 88.5           | 80.5%        | 70.5%        |
| U251     | 103,158,346 | 10,418,992,946 | 51,579,173     | 99,650,342  | 49,825,171      | 9,853,757,013  | 98.9           | 96.6%        | 94.6%        |
| U251-2Gy | 101,871,032 | 10,288,974,232 | 50,935,516     | 91,884,582  | 45,942,291      | 8,694,726,105  | 94.6           | 90.2%        | 84.5%        |

**Table S2.** Alignment of preprocessing and reference genome sequence

| Sampl e  | Total Reads | Total mapped | Multiple mapped | Unique mapped | Read-1    | Read-2    | Reads map to '+' | Reads map to '-' | Non-Splice reads | Splice reads | Reads Proper pair |
|----------|-------------|--------------|-----------------|---------------|-----------|-----------|------------------|------------------|------------------|--------------|-------------------|
| HA       | 118,116,76  | 101,152,21   | 3,222,44        | 97,929,77     | 49,090,87 | 48,838,90 | 48,881,38        | 49,048,39        | 82,920,70        | 15,009,07    | 86,633,49         |
| HA-2Gy   | 82,337,002  | 42,531,119   | 2,231,55        | 40,299,56     | 20,163,95 | 20,135,61 | 19,770,61        | 20,528,95        | 38,684,75        | 1,614,814    | 34,185,53         |
| U251     | 99,650,342  | 54,789,048   | 2,094,78        | 52,694,26     | 26,390,48 | 26,303,77 | 26,302,98        | 26,391,28        | 43,055,97        | 9,638,295    | 42,031,52         |
| U251-2Gy | 91,884,582  | 49,067,481   | 2,023,83        | 47,043,64     | 23,566,67 | 23,476,97 | 23,276,55        | 23,767,09        | 40,282,28        | 6,761,358    | 41,168,62         |

**Table S3** Primer sequences used in this study

| Quantitative real-time reverse-transcription PCR |                                 |             |                                 |
|--------------------------------------------------|---------------------------------|-------------|---------------------------------|
| <b>CTGF</b>                                      | F: 5'-CAGCATGGACGTTTCGTCTG-3'   | <b>AREG</b> | F: 5'-GTGGTGCTGTGCGCTCTTGATA-3' |
|                                                  | R: 5'-AACCACGGTTTGGTCCTTGG-3'   |             | R: 5'-CCCCAGAAAATGGTTCACGCT-3'  |
| <b>GAPDH</b>                                     | F: 5'-GTCATCCAACGGGAATGCA-3'    |             |                                 |
|                                                  | R: 5'-TGATCGGTTACCGTGATCAAAA-3' |             |                                 |

**Table S4.** shRNAs used in this study

| shRNAs         | Sequence                                                                                                        |
|----------------|-----------------------------------------------------------------------------------------------------------------|
| <b>shYAP#1</b> | 5'-<br>TGCTGTTGACAGTGAGCGCAGGGTTCATAACAGGCATAAATAGTGAAGCCACAGATGTATTTATGCCT<br>GTTATGAACCCTTGCCTACTGCCTCGGA -3' |
| <b>shYAP#2</b> | 5'-                                                                                                             |

|              |                                                                                                           |
|--------------|-----------------------------------------------------------------------------------------------------------|
|              | TGCTGTTGACAGTGAGCGCGGAACTATTTGAACAGCTGAATAGTGAAGCCACAGATGTATTCAGCTGT<br>TCAAATAGTTCCTTGCCTACTGCCTCGGA -3' |
| <i>shcon</i> | 5'- CCTAAGGTTAAGTCGCCCTCGCTCGAGCGAGGGCGACTTAACCTTAGG -3'                                                  |

**Table S5.** Antibodies used in this study.

| <i>Antigen</i> | <i>Application</i> | <i>Supplier</i> | <i>Catalog #</i> | <i>Dilution</i> |
|----------------|--------------------|-----------------|------------------|-----------------|
| <b>YAP</b>     | immunoblotting     | Abcam           | Ab52771          | 2000            |
| <b>p-YAP</b>   | immunoblotting     | Abcam           | Ab76252          | 1000            |
| <b>Lamin2</b>  | immunoblotting     | Abcam           | Ab16048          | 2000            |
| <b>β-actin</b> | IB immunoblotting  | Abcam           | Ab6276           | 1000            |

**Table S6.** LncRNAs regulated by radiation treatment in HA cells (DEG1).

| <i>symbol</i>      | <i>log2(FC)</i><br><i>HA2Gy/HA</i> | <i>symbol</i> | <i>log2(FC)</i><br><i>HA2Gy/HA</i> | <i>symbol</i> | <i>log2(FC)</i><br><i>HA2Gy/HA</i> | <i>symbol</i>         | <i>log2(FC)</i><br><i>HA2Gy/HA</i> |
|--------------------|------------------------------------|---------------|------------------------------------|---------------|------------------------------------|-----------------------|------------------------------------|
| CAPNS1             | -30.43                             | TERF2         | -25.25                             | SMIM7         | -24.55                             | RP11-946L20.4         | 4.03                               |
| RP11-408I18.9      | -29.77                             | PTRH2         | -25.24                             | HDLBP         | -24.55                             | SLX1A                 | 4.08                               |
| FN1                | -28.63                             | ITGA3         | -25.21                             | PDE4DIP       | -24.51                             | RP11-259O2.3          | 4.12                               |
| BANF1P1            | -27.99                             | EIF4G2        | -25.20                             | FTX           | -24.49                             | FSIP2                 | 4.25                               |
| PSMD12             | -27.99                             | SPARC         | -25.19                             | APOPT1        | -24.49                             | AC007743.1            | 4.29                               |
| MACF1              | -27.65                             | DST           | -25.19                             | EPS15L1       | -24.48                             | TMEM45A               | 4.32                               |
| FLNA               | -27.59                             | CALD1         | -25.17                             | FLNC          | -24.47                             | XXbac-<br>BPG154L12.4 | 4.41                               |
| RP11-<br>572P18.1  | -27.42                             | PDE4DIP       | -25.17                             | MYL6          | -24.47                             | AC011747.4            | 4.45                               |
| ACTB               | -27.34                             | COL4A2        | -25.16                             | EIF2B5        | -24.46                             | RP11-703G6.1          | 4.57                               |
| RP11-122C9.1       | -27.26                             | EEF2          | -25.13                             | RPL3          | -24.46                             | CYSLTR1               | 4.58                               |
| VCL                | -27.24                             | DNAJC19P5     | -25.12                             | CLTC          | -24.45                             | COL1A1                | 4.65                               |
| COL1A2             | -27.21                             | COL1A2        | -25.12                             | SCAND2P       | -24.44                             | RP11-153M7.3          | 4.73                               |
| CTB-108O6.2        | -27.03                             | FN1           | -25.10                             | GART          | -24.44                             | MIPOL1                | 4.83                               |
| MDM2               | -27.03                             | ITGA10        | -25.09                             | ANXA2         | -24.44                             | RP11-47122.3          | 4.99                               |
| CTD-<br>2033D15.1  | -26.96                             | DVL3          | -25.09                             | TRIO          | -24.43                             | LINC00887             | 6.16                               |
| FN1                | -26.85                             | SVIL          | -25.08                             | AC090602.2    | -24.42                             | DDX6                  | 11.00                              |
| FAT1               | -26.76                             | RPL17P26      | -25.07                             | REV3L         | -24.42                             | TAF10                 | 11.17                              |
| CTD-<br>3222D19.10 | -26.55                             | AP1M1         | -24.99                             | RP11-180I22.2 | -24.42                             | ZNF521                | 11.97                              |

|                   |        |                   |        |                    |        |               |       |
|-------------------|--------|-------------------|--------|--------------------|--------|---------------|-------|
| COL1A2            | -26.52 | SVIL              | -24.98 | UBE2Q2P1           | -24.41 | CORO1B        | 12.14 |
| MACF1             | -26.47 | RP11-<br>517B11.7 | -24.97 | HMGB1P24           | -24.41 | GTPBP10       | 12.21 |
| THBS1             | -26.37 | AP2M1             | -24.97 | RP11-351I24.3      | -24.41 | RP11-15H20.5  | 12.39 |
| GAPDH             | -26.34 | CANX              | -24.97 | DDX5               | -24.41 | TCTN1         | 12.88 |
| CTD-<br>2145A24.3 | -26.26 | CLTC              | -24.95 | SLC35E1            | -24.40 | BCAS2         | 13.29 |
| CTNNA1            | -26.25 | RNF213            | -24.94 | PDE4DIP            | -24.40 | MFSD2A        | 14.75 |
| PKM               | -26.17 | EIF2B5            | -24.94 | TP53BP2            | -24.40 | WDR76         | 15.08 |
| AC005776.1        | -26.10 | VMP1              | -24.92 | TBC1D9B            | -24.38 | BFAR          | 17.25 |
| PSMD2             | -26.09 | 2-Sep             | -24.92 | PSMD2              | -24.38 | MGAT4B        | 24.46 |
| GPR89A            | -26.06 | SMIM7             | -24.91 | TRIO               | -13.93 | CTD-2587H19.1 | 24.46 |
| TPM4              | -26.05 | ACOX1             | -24.90 | METTL16            | -12.69 | AKAP8         | 24.48 |
| RP11-<br>416A14.1 | -26.02 | STAG3L2           | -24.85 | RP11-<br>1017G21.4 | -3.01  | BAIAP2        | 24.65 |
| AP2M1             | -26.00 | JPX               | -24.83 | VIM-AS1            | -3.00  | PDE4DIP       | 24.66 |
| COL8A1            | -25.96 | HDLBP             | -24.83 | FN1                | -2.72  | PDE4DIP       | 24.66 |
| CALD1             | -25.88 | RP11-<br>640M9.2  | -24.82 | AP000769.7         | -2.13  | RP11-640M9.1  | 24.71 |
| COL5A1            | -25.88 | CYFIP2            | -24.80 | RPS29              | -2.07  | HTN1          | 24.71 |
| BOLA2B            | -25.81 | PMS2P5            | -24.80 | MYH9               | -1.11  | RP11-242F24.1 | 24.84 |
| VIM               | -25.78 | RP11-<br>231C14.4 | -24.79 | BRD4               | 1.11   | CPM           | 24.87 |
| CALD1             | -25.76 | RP11-<br>479G22.7 | -24.79 | EPS15L1            | 1.33   | ALG3          | 25.11 |
| EIF4G1            | -25.74 | RP11-<br>148G20.1 | -24.77 | PARP2              | 1.53   | PIWIL3        | 25.45 |
| AC004257.3        | -25.73 | CHERP             | -24.76 | COL4A2             | 1.56   | RP11-386I8.6  | 25.46 |
| NOMO3             | -25.68 | C19orf44          | -24.76 | PARP2              | 1.70   | OR6K1P        | 25.75 |
| RNF213            | -25.68 | AC007283.4        | -24.74 | COL1A1             | 1.73   | ENTHD2        | 25.80 |
| LPP               | -25.64 | AC005785.2        | -24.73 | MIR663A            | 1.76   | GTF2I         | 25.91 |
| CALD1             | -25.64 | AP1M1             | -24.70 | MYH9               | 1.92   | KCTD13        | 25.92 |
| CTC-429P9.4       | -25.63 | AC133106.2        | -24.66 | RP11-<br>309L24.2  | 2.12   | AD000685.1    | 25.93 |
| DVL3              | -25.58 | RP11-<br>19G24.2  | -24.65 | COL1A1             | 2.16   | ALG3          | 25.94 |
| SMARCC2           | -25.56 | KIF22             | -24.64 | AKAP8L             | 2.30   | RPS29         | 26.04 |
| TCF25             | -25.54 | BCL9              | -24.64 | SLC38A10           | 2.42   | AC003973.6    | 26.10 |
| AC009133.12       | -25.54 | CHMP4A            | -24.62 | RP11-572O6.1       | 2.42   | RP11-138I18.2 | 26.17 |
| NBPF9             | -25.53 | RBM8A             | -24.62 | TRIM65             | 2.48   | KCTD13        | 26.50 |
| NMT1              | -25.50 | CTB-186G2.4       | -24.61 | RP11-<br>763B22.7  | 2.52   | RP11-347C12.3 | 26.53 |

|              |        |              |        |            |      |               |       |
|--------------|--------|--------------|--------|------------|------|---------------|-------|
| TTC3         | -25.49 | TADA2A       | -24.58 | COL5A1-AS1 | 2.55 | RP11-654A16.1 | 26.61 |
| GTF2I        | -25.48 | PARP2        | -24.58 | MIR663A    | 2.92 | FLNA          | 27.18 |
| PSMD2        | -25.44 | RP6-206117.3 | -24.57 | COL4A2     | 3.01 | HSPH1         | 27.28 |
| FBN1         | -25.44 | INO80E       | -24.57 | CHRD       | 3.12 | RP11-864I4.3  | 27.60 |
| RP11-640M9.1 | -25.36 | SNHG9        | -24.56 | VIM        | 3.30 | CTD-2340E1.2  | 27.84 |
| AC002454.1   | -25.25 | PSMD2        | -24.56 | EPS15L1    | 3.71 |               |       |

**Table S7.** LncRNAs regulated by radiation treatment in U251 cells (DEG2).

| <i>symbol</i>     | <i>log2(FC)</i><br><i>HA2Gy/HA</i> | <i>symbol</i>     | <i>log2(FC)</i><br><i>HA2Gy/HA</i> | <i>symbol</i>    | <i>log2(FC)</i><br><i>HA2Gy/HA</i> | <i>symbol</i>      | <i>log2(FC)</i><br><i>HA2Gy/HA</i> |
|-------------------|------------------------------------|-------------------|------------------------------------|------------------|------------------------------------|--------------------|------------------------------------|
| SCARNA22          | -30.0155                           | HSPA8             | -23.3263                           | PARP2            | 3.10556                            | FASN               | 23.68874                           |
| DDX5              | -29.9317                           | ZWILCH            | -23.3138                           | CTD-<br>2328D6.1 | 3.13144                            | AC006483.5         | 23.74222                           |
| PSMD12            | -27.6677                           | PSMD2             | -23.2836                           | ANKRD30BL        | 3.43068                            | CTB-186G2.4        | 23.74438                           |
| ATP5O             | -26.8594                           | GPR89A            | -23.2514                           | MIR663A          | 3.52212                            | POLR3C             | 23.81528                           |
| RPS23P8           | -26.4378                           | YPEL3             | -23.2387                           | LINC00273        | 4.43776                            | RP11-162D9.3       | 23.82959                           |
| USMG5P1           | -25.74                             | AL590762.11       | -23.1821                           | MFSD9            | 13.0223                            | ATP5J2-PTCD1       | 23.90626                           |
| RPS29             | -25.3528                           | TBL2              | -23.1494                           | OAZ1             | 13.4426                            | RP11-184D12.1      | 23.95601                           |
| RAB8A             | -25.3249                           | RNF207            | -23.0443                           | PLXNA2           | 13.7878                            | ABCF3              | 23.96374                           |
| 2-Sep             | -25.3249                           | RPL13             | -23.0322                           | RHPN2            | 13.854                             | GABPB1             | 24.00406                           |
| RPLP0             | -25.3177                           | TBC1D9B           | -23.0288                           | BTN3A1           | 14.1938                            | UBR4               | 24.06994                           |
| PSMD2             | -24.8473                           | VPS33B            | -23.0192                           | ABHD16A          | 14.7986                            | UNC13D             | 24.12676                           |
| RP3-462E2.5       | -24.8204                           | MRPL38            | -23.004                            | HEXB             | 23.05634                           | RP11-865I6.2       | 24.25135                           |
| WDR45B            | -24.5878                           | KIAA1191          | -14.6666                           | VWA5B2           | 23.13719                           | CTD-2050E21.1      | 24.26486                           |
| GTF2I             | -24.0057                           | AC007620.3        | -14.0265                           | AC027269.2       | 23.2164                            | AC115522.3         | 24.27991                           |
| RP11-420K8.2      | -23.9733                           | CASP8AP2          | -12.4365                           | RFC2             | 23.24102                           | MYH9               | 24.30176                           |
| EEF1G             | -23.9163                           | EEF1A1P5          | -4.14512                           | PDE4DIP          | 23.24506                           | CTA-398F10.2       | 24.63527                           |
| ANXA2             | -23.7862                           | PARP2             | -2.59873                           | EPS15L1          | 23.26094                           | RP11-455F5.4       | 24.7512                            |
| ALG3              | -23.7836                           | PSMD2             | -1.6855                            | AC009093.1       | 23.27225                           | EIF2B5-AS1         | 24.80933                           |
| DPYSL3            | -23.744                            | ABCF3             | -1.46869                           | EIF4A1           | 23.29967                           | EMC1               | 24.93209                           |
| DONSON            | -23.7107                           | AP000769.7        | 1.49345                            | EIF2B5           | 23.32114                           | RP1-122K4.3        | 25.02645                           |
| ORAOV1            | -23.6768                           | RP5-<br>1125K23.1 | 1.52442                            | LMNA             | 23.36141                           | CTD-<br>3222D19.10 | 25.03803                           |
| ABCF3             | -23.6492                           | PARP2             | 1.73633                            | TRIM65           | 23.41965                           | UBR4               | 25.28273                           |
| SRP68             | -23.5887                           | ABCF3             | 1.82254                            | HIRIP3           | 23.41976                           | MYH9               | 25.84102                           |
| RP11-<br>416A14.1 | -23.5108                           | AC011747.4        | 2.3247                             | ZWILCH           | 23.44719                           | RP11-644F5.16      | 25.95554                           |
| AP2M1             | -23.424                            | RP11-703G6.1      | 2.51541                            | RP11-87N3.6      | 23.54499                           | WDR1               | 28.37899                           |
| BANF1P1           | -23.3787                           | ALDOA             | 2.63702                            | FLII             | 23.62151                           |                    |                                    |
| RP11-666A1.4      | -23.3604                           | RP11-             | 3.05309                            | BMP2KL           | 23.65707                           |                    |                                    |

|  |  |         |  |  |  |  |  |
|--|--|---------|--|--|--|--|--|
|  |  | 153M7.3 |  |  |  |  |  |
|--|--|---------|--|--|--|--|--|

**Table S8.** IncRNAs differentially expressed between HA and U251 cells under normal condition (DEG3)

| <i>symbol</i>  | <i>log<sub>2</sub>(FC)</i><br><i>HA2Gy/HA</i> | <i>symbol</i> | <i>log<sub>2</sub>(FC)</i><br><i>HA2Gy/HA</i> | <i>symbol</i> | <i>log<sub>2</sub>(FC)</i><br><i>HA2Gy/HA</i> | <i>symbol</i> | <i>log<sub>2</sub>(FC)</i><br><i>HA2Gy/HA</i> |
|----------------|-----------------------------------------------|---------------|-----------------------------------------------|---------------|-----------------------------------------------|---------------|-----------------------------------------------|
| MLPH           | -29.2015                                      | ILVBL         | -24.7192                                      | ACOX1         | -23.7864                                      | CTC-429P9.4   | 24.10049                                      |
| MT1L           | -28.4803                                      | APP           | -24.6827                                      | SSR3          | -23.7815                                      | HEXB          | 24.13299                                      |
| CTD-2231H16.1  | -28.4733                                      | TSEN15P2      | -24.6696                                      | EFTUD2        | -23.7813                                      | SQSTM1        | 24.20294                                      |
| FLNA           | -28.1115                                      | RBM8A         | -24.5926                                      | POLR3F        | -10.2467                                      | NIP7          | 24.22725                                      |
| MYH9           | -27.9512                                      | POLR3C        | -24.5607                                      | RBM38         | -10.1846                                      | SMIM7         | 24.24529                                      |
| SPOCD1         | -27.7548                                      | ARL8B         | -24.553                                       | MICAL2        | -5.63051                                      | VPS33B        | 24.27437                                      |
| MYH9           | -27.5076                                      | AC093375.1    | -24.5323                                      | MYH9          | -4.66108                                      | TBC1D9B       | 24.28278                                      |
| FAT1           | -27.2818                                      | AC068831.3    | -24.5248                                      | FAT1          | -3.33572                                      | CD44          | 24.28678                                      |
| KIAA1755       | -27.134                                       | CTNNA1        | -24.5239                                      | CTD-2033D15.1 | -3.153                                        | RNF207        | 24.29753                                      |
| CTD-3222D19.10 | -27.0733                                      | NOTCH3        | -24.5183                                      | AP000769.7    | -3.00381                                      | VWA5B2        | 24.29759                                      |
| COL4A2         | -26.8118                                      | FXR2          | -24.5103                                      | AC005776.1    | -2.65238                                      | HEXB          | 24.36722                                      |
| AC112721.2     | -26.6869                                      | RP4-565E6.1   | -24.4907                                      | FLNA          | -2.50678                                      | PIH1D1        | 24.41431                                      |
| FAT1           | -26.4584                                      | VCL           | -24.4843                                      | AC113189.5    | -2.47135                                      | MRPL38        | 24.45645                                      |
| AC004702.2     | -26.3229                                      | ECH1          | -24.4812                                      | MIR663A       | -2.36666                                      | CCT7P2        | 24.49198                                      |
| ZSCAN23        | -26.2232                                      | STX1A         | -24.4794                                      | CTB-51J22.1   | -1.93264                                      | YPEL3         | 24.49355                                      |
| RP11-757F18.5  | -26.1742                                      | DYNC1H1       | -24.4787                                      | AP2M1         | -1.84344                                      | KIAA0430      | 24.51462                                      |
| CALD1          | -26.165                                       | ENC1          | -24.4597                                      | CRYZL1        | -1.72518                                      | PSMD2         | 24.53784                                      |
| CTC-429P9.4    | -26.158                                       | MOK           | -24.4168                                      | AC004257.1    | -1.46716                                      | KCTD13        | 24.55584                                      |
| ITGA3          | -26.0399                                      | RP11-33N16.2  | -24.4012                                      | MAPK3         | -1.45407                                      | RP11-666A1.4  | 24.61527                                      |
| TTC3           | -26.0179                                      | RP11-426C22.6 | -24.3727                                      | AP1M1         | -1.34573                                      | RP11-654A16.1 | 24.6315                                       |
| ITGA3          | -25.9098                                      | ELN           | -24.3606                                      | MIR663A       | -1.11117                                      | GATAD2A       | 24.6812                                       |
| MYH9           | -25.8099                                      | SAT2          | -24.3092                                      | CTD-2013N17.4 | -1.1023                                       | IFT80         | 24.75091                                      |
| RP11-1017G21.3 | -25.801                                       | CRYZL1        | -24.3058                                      | ZNF29P        | 1.06187                                       | COL21A1       | 24.75163                                      |
| KMT2A          | -25.7313                                      | EEFSEC        | -24.2791                                      | LRR1          | 1.1036                                        | PXDN          | 24.78932                                      |
| SPARC          | -25.7148                                      | EFEMP2        | -24.2787                                      | EIF4G1        | 1.21695                                       | TFRC          | 24.8536                                       |
| LINC00982      | -25.7018                                      | RP11-562A8.5  | -24.2779                                      | RP11-666A1.3  | 1.23804                                       | DDX5          | 24.89092                                      |
| CALD1          | -25.6969                                      | ACTG1         | -24.2627                                      | POLR2H        | 1.27504                                       | RP1-309F20.3  | 24.91432                                      |
| RPL7L1P9       | -25.6942                                      | TBL2          | -24.2596                                      | PARP2         | 1.61236                                       | RP4-535B20.1  | 24.92749                                      |
| COL4A2         | -25.6841                                      | LMNA          | -24.2489                                      | ALDOA         | 1.68529                                       | HEXB          | 24.95792                                      |
| DVL3           | -25.6106                                      | NOTCH3        | -24.2388                                      | RPL17P40      | 1.69656                                       | DRG2          | 24.98775                                      |

|               |          |                   |          |              |          |                   |          |
|---------------|----------|-------------------|----------|--------------|----------|-------------------|----------|
| PDE4DIP       | -25.5274 | PRPF8             | -24.2003 | AP000226.9   | 1.7079   | DPYSL3            | 24.99824 |
| ACOX1         | -25.4248 | RP11-455F5.4      | -24.1812 | LRR1         | 1.72236  | ALG3              | 25.03783 |
| TPM4          | -25.353  | IGF2BP3           | -24.167  | AC113189.5   | 1.74535  | AP000705.8        | 25.18554 |
| RP11-479G22.7 | -25.3009 | ALG3              | -24.1643 | RHOQP1       | 1.81572  | RP11-144N1.1      | 25.1897  |
| AC005785.2    | -25.2563 | RUVBL1            | -24.1559 | ALG3         | 2.34809  | ATM               | 25.1985  |
| MYLK          | -25.2004 | MRTO4             | -24.1474 | PSMD2        | 2.67755  | AC005838.2        | 25.22047 |
| KIF22         | -25.1687 | GTF2I             | -24.1281 | ABCF3        | 2.79102  | BRD4              | 25.22907 |
| RP11-490G2.2  | -25.1628 | LIMK1             | -24.0878 | PARP2        | 2.83259  | ALG3              | 25.25269 |
| CHMP4A        | -25.1489 | CTD-<br>2562J15.4 | -24.0863 | RP11-778D9.4 | 2.93158  | GTF2I             | 25.25969 |
| CTB-186G2.4   | -25.1333 | SAT2              | -24.0787 | POLR2H       | 2.96147  | EIF2B5            | 25.27774 |
| ITGAV         | -25.1226 | ILVBL             | -24.0735 | ABHD11       | 3.09964  | BTF3L4P4          | 25.33309 |
| STX1A         | -25.0993 | TP53BP2           | -24.0569 | ANXA2        | 3.42844  | RFC2              | 25.46723 |
| VCAN          | -25.0821 | WBSCR22           | -24.0507 | ALDOA        | 3.57036  | EIF3FP3           | 25.55061 |
| RNF213        | -25.039  | FAM126A           | -24.0417 | RPL4         | 3.85583  | RP11-479I1.4      | 25.658   |
| OGT           | -25.0353 | TENC1             | -24.0398 | NEFL         | 5.65781  | FUBP1             | 25.73963 |
| TRIO          | -24.9507 | SIL1              | -24.0042 | UBXN4        | 12.8754  | DOCK5             | 25.79471 |
| AC090602.2    | -24.9469 | RP11-<br>344E13.1 | -23.9985 | KDM3B        | 13.0363  | WDR45B            | 25.84205 |
| UBE2Q2P1      | -24.9381 | MED13             | -23.9794 | HNRNPH1      | 23.79187 | CTC-471F3.4       | 25.85342 |
| CBR4          | -24.9206 | ZMYM3             | -23.9758 | GART         | 23.82223 | EIF2B5            | 25.86542 |
| TP53BP2       | -24.9205 | APLP2             | -23.9738 | RPS2         | 23.8296  | PSMD2             | 26.10155 |
| PIAS3         | -24.8931 | 6-Mar             | -23.9539 | ANXA2        | 23.83998 | PES1P1            | 26.39679 |
| PSAP          | -24.8851 | YPEL3             | -23.9527 | NONO         | 23.85205 | TUFMP1            | 26.53343 |
| HDLBP         | -24.8784 | C5orf45           | -23.9293 | EIF2B5       | 23.86454 | RPLP0             | 26.573   |
| WDR20         | -24.8576 | EPS15L1           | -23.9229 | TADA2A       | 23.88655 | RAB8A             | 26.57901 |
| PRPF40B       | -24.848  | RP4-565E6.1       | -23.9194 | LGALS1       | 23.89706 | RPS29             | 26.60707 |
| KIAA0430      | -24.8124 | RP13-<br>766D20.2 | -23.8998 | HAUS1        | 23.92448 | RP11-<br>281P11.1 | 26.88395 |
| CTA-797E19.1  | -24.8079 | SNX14             | -23.8907 | PRC1         | 23.92737 | AL022344.2        | 26.92266 |
| GANAB         | -24.767  | CYFIP2            | -23.8905 | PDCD2L       | 23.94498 | USMG5P1           | 26.99399 |
| MACF1         | -24.7624 | POLR3C            | -23.8814 | RPL8         | 23.94548 | ACTB              | 27.07713 |
| NBPF9         | -24.7552 | ELN               | -23.8779 | 2-Sep        | 23.94772 | RP11-<br>123O22.1 | 27.10826 |
| PGM3          | -24.7444 | SLC43A2           | -23.8711 | AP005482.1   | 24.01806 | RP11-<br>698N11.2 | 27.18091 |
| AP001439.2    | -24.7372 | WDR20             | -23.8678 | SERF2        | 24.04399 | RPS2P55           | 27.4532  |
| COL4A2        | -24.7326 | RUNX1             | -23.8283 | APLP2        | 24.05669 | RP11-<br>734I18.1 | 27.84075 |
| SLC17A9       | -24.73   | PDE4DIP           | -23.8082 | API5         | 24.07051 | ATP5O             | 28.11362 |
| CTD-2334D19.1 | -24.7263 | ELN               | -23.797  | AC113189.5   | 24.07155 |                   |          |

**Table S9.** lncRNAs differentially expressed between HA and U251 cells under normal condition (DEG4).

| <i>symbol</i> | <i>log2(FC)</i><br>HA2Gy/HA | <i>symbol</i> | <i>log2(FC)</i><br>HA2Gy/HA | <i>symbol</i> | <i>log2(FC)</i><br>HA2Gy/HA | <i>symbol</i>  | <i>log2(FC)</i><br>HA2Gy/HA |
|---------------|-----------------------------|---------------|-----------------------------|---------------|-----------------------------|----------------|-----------------------------|
| CTD-2231H16.1 | -28.2181                    | PAN3          | -14.1816                    | RFC2          | 24.16873                    | COL21A1        | 24.88169                    |
| CPNE7         | -27.8603                    | MRPS16        | -12.3834                    | ABHD11        | 24.18164                    | MATR3          | 24.89958                    |
| RP5-1057J7.7  | -26.9442                    | TCEA1         | -12.3534                    | RAB8A         | 24.20729                    | AC005838.2     | 24.92428                    |
| RP11-86414.3  | -26.8267                    | CD63          | -11.8018                    | RP11-231C14.4 | 24.2635                     | EMC1           | 24.92677                    |
| HSPH1         | -26.5167                    | AC123886.2    | -5.544                      | AP2M1         | 24.28745                    | EIF4G1         | 24.97057                    |
| ITGA3         | -26.4081                    | TFPI          | -5.19127                    | MACF1         | 24.3554                     | PSMD2          | 24.97591                    |
| COL6A1        | -26.3143                    | PKNOX2        | -4.82487                    | AC005776.1    | 24.39108                    | ITGA3          | 25.00214                    |
| RP11-431N15.2 | -26.11                      | COL4A2        | -4.37694                    | RPL31P7       | 24.4062                     | CTD-3222D19.10 | 25.03808                    |
| RP11-654A16.1 | -25.8393                    | MYH9          | -3.49144                    | MACF1         | 24.40914                    | AC009133.12    | 25.05195                    |
| RPS29         | -25.2727                    | AD000685.1    | -3.31155                    | ABHD11        | 24.4444                     | PPP4C          | 25.26687                    |
| COL4A2        | -25.2431                    | SLX1A         | -3.08958                    | PKM           | 24.46281                    | UBR4           | 25.2808                     |
| SMIM7         | -25.1991                    | AKAP8L        | -2.59452                    | N4BP2L2       | 24.46434                    | PSMD2          | 25.32212                    |
| TBC1D9B       | -25.1878                    | COL4A2-AS1    | -2.29782                    | ZNF286A       | 24.49903                    | PES1P1         | 25.35494                    |
| ALG3          | -25.1726                    | KCTD13        | -2.08093                    | FLCN          | 24.53618                    | GTF2I          | 25.38061                    |
| GTF2I         | -25.1383                    | EPS15L1       | -1.83786                    | PMS2P5        | 24.5381                     | TUFMP1         | 25.44116                    |
| RP11-390M11.1 | -25.059                     | GTF2I         | -1.83462                    | AC004257.3    | 24.55405                    | INO80E         | 25.50898                    |
| VIM           | -24.8474                    | AP1M1         | -1.7975                     | RPEP4         | 24.57506                    | MRTO4          | 25.73303                    |
| DVL3          | -24.7793                    | RP4-778K6.1   | -1.58012                    | MSMP          | 24.61587                    | SNHG9          | 25.8286                     |
| CTB-51J22.1   | -24.6695                    | MYH9          | -1.53901                    | LRR1          | 24.64955                    | EIF4G1         | 25.90119                    |
| RP11-46H11.12 | -24.5855                    | RP11-572O6.1  | -1.50144                    | MACF1         | 24.66835                    | CTC-429P9.4    | 25.94586                    |
| ELN           | -24.455                     | ILVBL         | 1.26417                     | EEF2          | 24.72192                    | FAM129B        | 26.02729                    |
| POLR3GL       | -24.3864                    | RHOQP1        | 1.44822                     | CLTC          | 24.73609                    | LINC00052      | 26.04174                    |
| ZSCAN2        | -24.376                     | RPS29         | 2.7986                      | EIF4G1        | 24.77778                    | DVL3           | 26.34607                    |
| ALG3          | -24.3463                    | UNC13D        | 4.8658                      | RP11-469N6.1  | 24.79228                    | GAPDH          | 26.80652                    |
| CD302         | -16.4904                    | TRIO          | 12.1751                     | AP1M1         | 24.79631                    | AC011330.6     | 27.45099                    |
| RAB7L1        | -15.9894                    | DNTTIP2       | 16.7251                     | RP11-317P15.4 | 24.834                      | SNORD3B-2      | 27.64554                    |
| CDKN1A        | -15.598                     | ILVBL         | 24.15179                    | SYNE2         | 24.8575                     | RPS2P55        | 27.74419                    |
